# Supplementary material for: New Predictive Equations for Resting Energy Expenditure in Normal to Overweight and Obese Population
Source: Int J Endocrinol. 2019 Dec 18;2019:5727496. doi: 10.1155/2019/5727496 (PMC6935811; doi:10.1155/2019/5727496)
Supplement: Supplementary Materials — A simplified calculator for the main equations (AA_1 and AA_FFM). Instruction for use: according to the gender, please either insert the age, weight, and height or the bioelectrical impedance data such as FFM, FM, and TBW and then get the RMR in kcal/day. [file 5727496.f1.xlsx]

## Sheet: Sheet2
				Almajwal-Abulmeaty Equation For RMR Prediction
	Men						Women
	Age (years)			FFM (Kg)			Age (years)			FFM (Kg)
	Wt (Kg)			FM (Kg)			Wt (Kg)			FM (Kg)
	Ht (cm)			TBW (L)			Ht (cm)			TBW (L)
	IBW (Kg)	-117.921					IBW (Kg)	-90.7027
	AdjWt(Kg)	-88.441					AdjWt(Kg)	-68.027
	AA_1 (Kcal/day)	-274.218		AA_FFM (Kcal/day)	892.117		AA_1 (Kcal/day)	565.14		AA_FFM (Kcal/day)	683.588
